# Supplementary material
Source: HighWire-hosted journal article supplement (https://www.plantphysiol.org/content/suppl/2013/11/26/pp.113.224816)
Supplement: 224816supptbls.pdf [file 224816supptbls.pdf]

Supplemental Data:  
Supplemental Tables:

---

**Table S1.** Marker selection steps during genotyping of the IL.

---

| Selection step                                                         | No. markers excluded | No. remaining markers |
|------------------------------------------------------------------------|----------------------|-----------------------|
| overall                                                                | 56,110               | 56,110                |
| Genome Studio output<br>(GenTrain $\leq$ 0.9, Call Frequency $\neq$ 1) | -39,966              | 16,144                |
| not included in the CoreSet <sup>a</sup>                               | -9,775               | 6,369                 |
| no confirmed genome position                                           | -106                 | 6,263                 |
| monomorphic between the parents                                        | -4,402               | 1,861                 |

---

<sup>a</sup> selection of 32,650 SNP which were found to show highly reproducible results across a diverse set of inbred lines.

**Table S2.** Single environment estimates of genotypic ( $\sigma^2_g$ ) and residual error ( $\sigma^2$ ) variance components as well as estimates of repeatability of seven traits evaluated in the field and in the greenhouse.

| Trait <sup>a</sup> | Experimental condition | $\sigma^2_g$   | $\sigma^2$ | rep. <sup>c</sup> |
|--------------------|------------------------|----------------|------------|-------------------|
| $\Delta^{13}C$     | field                  | 0.04           | 0.05       | 0.44              |
|                    | greenhouse             | 0.06           | 0.16       | 0.27              |
| Fflow              | field                  | 2.58           | 3.70       | 0.41              |
|                    | greenhouse             | 0.94           | 5.68       | 0.14              |
| Mflow              | field                  | 1.58           | 3.11       | 0.34              |
|                    | greenhouse             | 0.43           | 3.07       | 0.12              |
| PH                 | field                  | 112.76         | 90.51      | 0.55              |
|                    | greenhouse             | 191.12         | 369.38     | 0.34              |
| SenL               | field                  | - <sup>b</sup> | -          | -                 |
|                    | greenhouse             | 0.89           | 4.04       | 0.18              |
| SPAD               | field                  | 5.07           | 8.66       | 0.37              |
|                    | greenhouse             | 2.17           | 13.63      | 0.14              |
| $F_vF_M^{-1}$      | field                  | - <sup>b</sup> | -          | -                 |
|                    | greenhouse             | - <sup>b</sup> | -          | -                 |

<sup>a</sup>  $\Delta^{13}C$ ; stable carbon isotope discrimination [‰], Fflow; time to female flowering [days], Mflow; time to male flowering [days], PH; plant height [cm], SenL; percentage of senescent leaves [%], SPAD; chlorophyll content of the ear leaf,  $F_vF_M^{-1}$ ; maximum photosynthetic capacity

<sup>b</sup> not significant at  $P < 0.05$

<sup>c</sup> repeatability

**Table S3.** Donor genome target regions associated with time to female flowering (Fflow), time to male flowering (Mflow), plant height (PH), chlorophyll content of the ear leaf (SPAD) detected by stepwise regression on means averaged across greenhouse and field environments and for seed germination vigor (GV) evaluated in a growth chamber experiment.

| Trait <sup>a</sup> | Target region ID | Chr <sup>b</sup> . | Target region position <sup>c</sup> [Mbp ] |        | Length of target region [Mbp] | ADD <sup>d</sup> | R <sub>i</sub> <sup>2e</sup> [%] |
|--------------------|------------------|--------------------|--------------------------------------------|--------|-------------------------------|------------------|----------------------------------|
|                    |                  |                    | start                                      | end    |                               |                  |                                  |
| Fflow              | 5                | 1                  | 36.05                                      | 39.28  | 3.23                          | 0.59             | 0.06                             |
|                    | 9                | 1                  | 75.20                                      | 81.36  | 6.16                          | -1.18            | 0.13                             |
|                    | 24               | 1                  | 254.97                                     | 257.03 | 2.06                          | 0.56             | 0.04                             |
|                    | 26               | 1                  | 257.96                                     | 260.23 | 2.27                          | 0.71             | 0.01                             |
|                    | 48               | 2                  | 187.29                                     | 204.90 | 17.61                         | 0.54             | 0.03                             |
|                    | 51               | 2                  | 214.32                                     | 216.39 | 2.07                          | 0.47             | 0.02                             |
|                    | 76               | 5                  | 10.68                                      | 19.76  | 9.08                          | -0.53            | 0.04                             |
|                    | 88               | 5                  | 206.83                                     | 208.78 | 1.95                          | 0.78             | 0.10                             |
|                    | 96               | 6                  | 120.84                                     | 130.41 | 9.57                          | 0.70             | 0.04                             |
|                    | 122              | 8                  | 6.73                                       | 8.43   | 1.70                          | -0.64            | 0.05                             |
|                    | 133              | 8                  | 151.27                                     | 156.26 | 4.99                          | -0.61            | 0.06                             |
|                    | 146              | 9                  | 16.72                                      | 132.74 | 116.02                        | 0.49             | 0.02                             |
|                    | 160              | 10                 | 74.91                                      | 125.89 | 50.98                         | 0.77             | 0.06                             |
| Mflow              | 5                | 1                  | 36.05                                      | 39.28  | 3.23                          | 0.43             | 0.06                             |
|                    | 10               | 1                  | 81.36                                      | 156.35 | 74.99                         | -0.68            | 0.11                             |
|                    | 29               | 1                  | 294.50                                     | 297.61 | 3.11                          | -0.36            | 0.03                             |
|                    | 54               | 2                  | 227.75                                     | 232.32 | 4.57                          | 0.38             | 0.03                             |
|                    | 128              | 8                  | 74.35                                      | 78.88  | 4.53                          | -0.66            | 0.02                             |
|                    | 129              | 8                  | 78.88                                      | 119.48 | 40.60                         | 0.99             | 0.05                             |
|                    | 133              | 8                  | 151.27                                     | 156.26 | 4.99                          | -0.81            | 0.12                             |
| PH                 | 6                | 1                  | 39.28                                      | 41.79  | 2.51                          | 7.44             | 0.05                             |
|                    | 9                | 1                  | 75.20                                      | 81.36  | 6.16                          | -12.45           | 0.10                             |
|                    | 59               | 3                  | 147.33                                     | 175.14 | 27.81                         | 12.11            | 0.10                             |
|                    | 77               | 5                  | 19.76                                      | 58.79  | 39.03                         | -13.70           | 0.13                             |
|                    | 147              | 9                  | 132.74                                     | 138.99 | 6.25                          | -14.98           | 0.05                             |

**Table S3** continued

| Trait <sup>a</sup> | Target region ID | Chr. <sup>b</sup> | Target region position <sup>c</sup> [Mbp] |        | Length of target region [Mbp] | ADD <sup>d</sup> | R <sub>i</sub> <sup>2e</sup> [%] |
|--------------------|------------------|-------------------|-------------------------------------------|--------|-------------------------------|------------------|----------------------------------|
|                    |                  |                   | start                                     | end    |                               |                  |                                  |
| SPAD               | 1                | 1                 | 4.53                                      | 10.19  | 5.66                          | -0.43            | 0.01                             |
|                    | 19               | 1                 | 228.16                                    | 230.52 | 2.36                          | -0.45            | 0.01                             |
|                    | 24               | 1                 | 254.97                                    | 257.03 | 2.06                          | 0.99             | 0.04                             |
|                    | 29               | 1                 | 294.50                                    | 297.61 | 3.11                          | -0.53            | 0.01                             |
|                    | 32               | 2                 | 6.56                                      | 9.18   | 2.62                          | 0.37             | 0.01                             |
|                    | 35               | 2                 | 12.66                                     | 19.06  | 6.40                          | 0.56             | 0.02                             |
|                    | 49               | 2                 | 204.90                                    | 211.90 | 7.00                          | -1.32            | 0.03                             |
|                    | 54               | 2                 | 227.75                                    | 232.32 | 4.57                          | 1.06             | 0.02                             |
|                    | 59               | 3                 | 147.33                                    | 175.14 | 27.81                         | 1.10             | 0.05                             |
|                    | 70               | 3                 | 225.22                                    | 225.82 | 0.60                          | -0.79            | 0.02                             |
|                    | 71               | 4                 | 15.97                                     | 31.62  | 15.65                         | -1.06            | 0.02                             |
|                    | 76               | 5                 | 10.68                                     | 19.76  | 9.08                          | 0.84             | 0.03                             |
|                    | 88               | 5                 | 206.83                                    | 208.78 | 1.95                          | -0.77            | 0.05                             |
|                    | 94               | 6                 | 0.00                                      | 3.17   | 3.17                          | 1.46             | 0.04                             |
|                    | 118              | 7                 | 139.73                                    | 147.07 | 7.34                          | 0.99             | 0.05                             |
|                    | 123              | 8                 | 8.43                                      | 13.78  | 5.35                          | -0.81            | 0.02                             |
|                    | 124              | 8                 | 13.78                                     | 17.60  | 3.82                          | 1.26             | 0.04                             |
|                    | 128              | 8                 | 74.35                                     | 78.88  | 4.53                          | -1.49            | 0.08                             |
|                    | 130              | 8                 | 119.48                                    | 124.17 | 4.69                          | 0.84             | 0.02                             |
|                    | 133              | 8                 | 151.27                                    | 156.26 | 4.99                          | -1.29            | 0.08                             |
|                    | 140              | 8                 | 168.94                                    | 174.25 | 5.31                          | -0.95            | 0.03                             |
|                    | 141              | 9                 | 0.00                                      | 6.63   | 6.63                          | -0.94            | 0.01                             |
|                    | 142              | 9                 | 6.63                                      | 9.21   | 2.58                          | 1.36             | 0.02                             |
|                    | 143              | 9                 | 9.21                                      | 11.31  | 2.10                          | -1.58            | 0.05                             |
|                    | 147              | 9                 | 132.74                                    | 138.99 | 6.25                          | -0.75            | 0.01                             |
|                    | 151              | 9                 | 152.80                                    | 153.85 | 1.05                          | 0.89             | 0.04                             |
|                    | 161              | 10                | 125.89                                    | 133.15 | 7.26                          | -1.41            | 0.07                             |
|                    | 162              | 10                | 133.15                                    | 135.71 | 2.56                          | 0.75             | 0.02                             |

**Table S3** continued

| Trait <sup>a</sup> | Target region ID | Chr. | Target region position <sup>c</sup> [Mbp] |        | Length of target region [Mbp] | ADD <sup>d</sup> | R <sub>i</sub> <sup>2e</sup> [%] |
|--------------------|------------------|------|-------------------------------------------|--------|-------------------------------|------------------|----------------------------------|
|                    |                  |      | start                                     | end    |                               |                  |                                  |
| GV                 | 3                | 1    | 17.09                                     | 27.72  | 10.63                         | -0.09            | 0.02                             |
|                    | 68               | 3    | 216.97                                    | 219.65 | 2.68                          | 0.04             | 0.02                             |
|                    | 82               | 5    | 167.69                                    | 168.95 | 1.26                          | 0.09             | 0.04                             |
|                    | 89               | 5    | 208.78                                    | 212.15 | 3.37                          | -0.10            | 0.13                             |
|                    | 122              | 8    | 6.73                                      | 8.43   | 1.70                          | 0.17             | 0.11                             |
|                    | 123              | 8    | 8.43                                      | 13.78  | 5.35                          | -0.11            | 0.07                             |
|                    | 140              | 8    | 168.94                                    | 174.25 | 5.31                          | -0.10            | 0.06                             |
|                    | 150              | 9    | 151.12                                    | 152.80 | 1.68                          | -0.06            | 0.02                             |
|                    | 156              | 10   | 6.42                                      | 9.18   | 2.76                          | -0.05            | 0.04                             |

<sup>a</sup> Fflow; time to female flowering [days], Mflow; time to male flowering [days], PH; plant height [cm], SPAD; chlorophyll content of the ear leaf, GV, seed germination vigor [%],<sup>b</sup> chromosome, <sup>c</sup> estimated borders of the target regions. The start of a target region was calculated as the position of the first SNP marker on the target region minus half the distance to the next marker flanking the target region. The end of a target region was calculated as the position of the last SNP marker on the target region plus half the distance to the next marker flanking the target region, <sup>d</sup> additive effect of the target region carrying the donor alleles relative to the recurrent parent, <sup>e</sup> percentage of phenotypic variance explained.
